# Supplementary material for: Hyaluronic Acid Receptor Stabilin-2 Regulates Erk Phosphorylation and Arterial - Venous Differentiation in Zebrafish
Source: PubMed Central journal article supplement (PMC3938420; doi:10.1371/journal.pone.0088614), 2014-02-28
Supplement: pone.0088614.s001.pdf [file pone.0088614.s001.pdf]

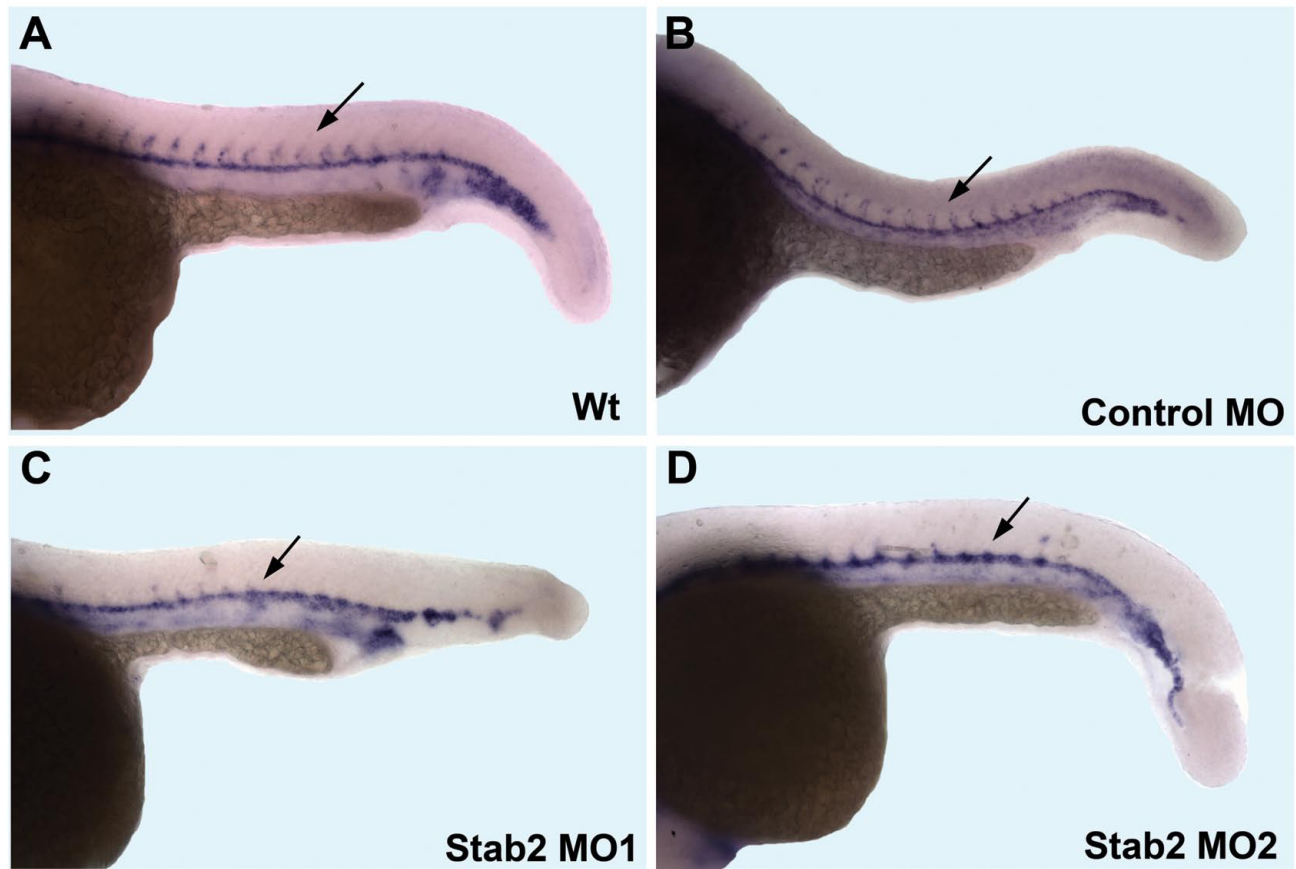

**Suppl. Figure S1: Two different *Stab2* morpholinos result in similar phenotypes.** (A-D) In situ hybridization analysis shows *kdr1* RNA expression at 24 hpf in wild type uninjected (A), standard control morpholino injected (B) and embryos injected with two different *Stab2* translation blocking morpholinos (C and D). *Kdr1* expression was unaffected by control morpholino injection. *Stab2* morphants display a lack of ISVs. Embryos were microinjected with 3.75 ng of a standard control morpholino, 7.5 ng of *Stab2* MO1, or 2.5 ng of *Stab2* MO2. Arrows indicate ISVs (A and B) or missing ISVs (C and D).
