# Supplementary material for: Hyaluronic Acid Receptor Stabilin-2 Regulates Erk Phosphorylation and Arterial - Venous Differentiation in Zebrafish
Source: PubMed Central journal article supplement (PMC3938420; doi:10.1371/journal.pone.0088614), 2014-02-28
Supplement: pone.0088614.s002.pdf [file pone.0088614.s002.pdf]

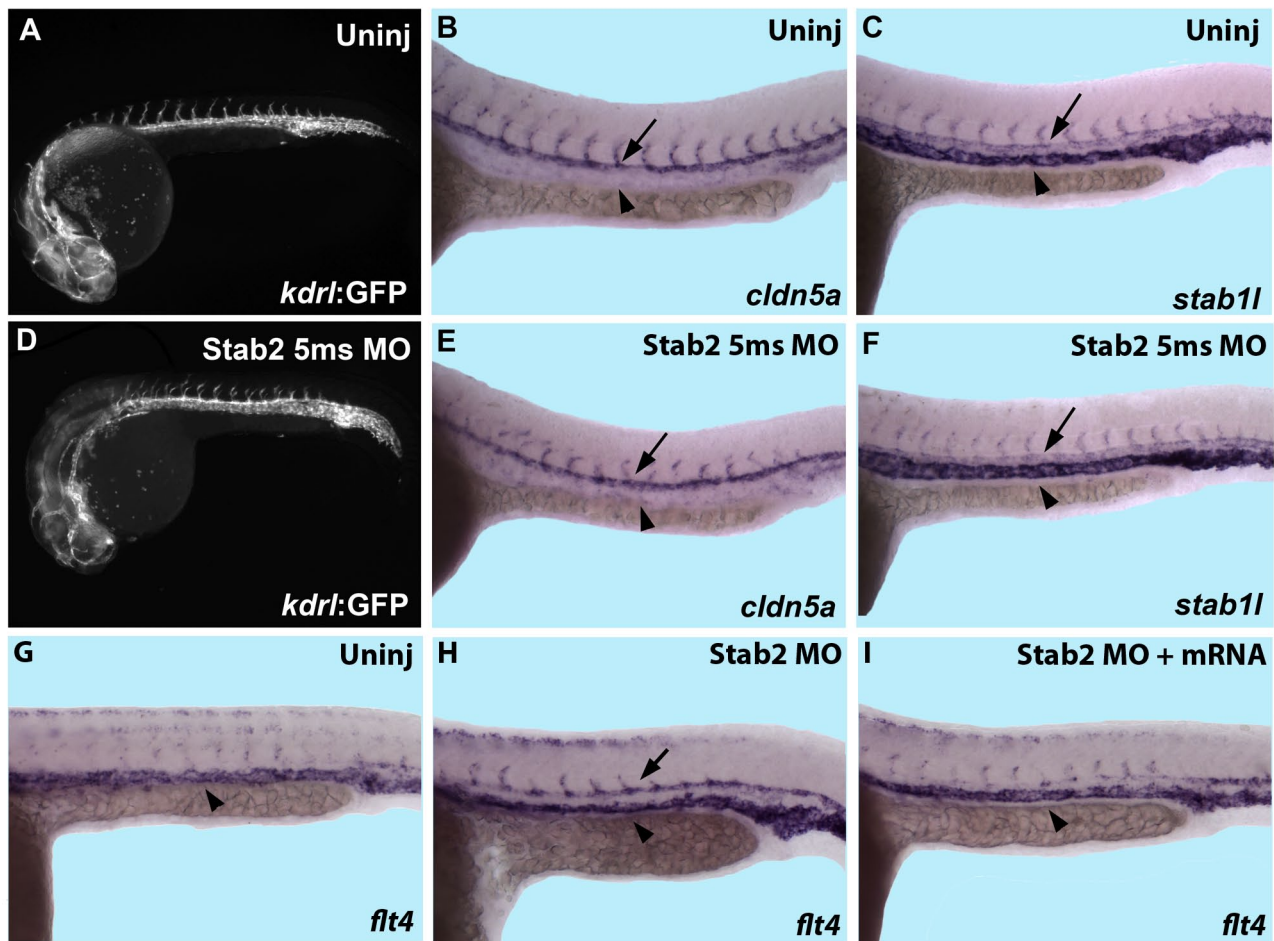

**Supplemental Figure S2. Specificity of Stab2 MO knockdown phenotype demonstrated by control 5 base pair mismatch Stab2 MO injection and a partial rescue by *stab2* mRNA injection.** (A,D) Morphant embryos do not display any apparent reduction in ISVs by Tg(*kdr1*:GFP) expression at 24 hpf when injected with a 5 base pair mismatch Stab2 morpholino (Stab2 5ms MO). (B,C,E,F) Stab2 5 ms MO-injected embryos show normal arterial *cldn5a* (B,E) and venous *stab11* (C,F) expression. (G-I) Venous expansion of *flt4* is apparent in Stab2 morphant embryos (H) as compared to uninjected controls (G), but is rescued by coinjection with *stab2* mRNA (I). Lateral view of 24 hpf embryos shown, anterior is to the left. Morphants were injected with a cocktail containing 3.75 ng Stab2 5ms MO + 3.75 ng p53 MO (D-F), 3.75 ng Stab2 MO + 3.75 ng p53 MO (H), or 3.75 ng Stab2 MO, 3.75 ng p53 MO and 160 pg *stab2* mRNA (I). Arrows indicate DA and arrowheads indicate PCV in all panels.
