# Supplementary material for: Hyaluronic Acid Receptor Stabilin-2 Regulates Erk Phosphorylation and Arterial - Venous Differentiation in Zebrafish
Source: PubMed Central journal article supplement (PMC3938420; doi:10.1371/journal.pone.0088614), 2014-02-28
Supplement: pone.0088614.s004.pdf [file pone.0088614.s004.pdf]

1/1  
|  
ATG CCC TTC CTG CTG GAC GTG GTG TGC GGC GGA CTG ATC CTG CTG CTG GGA ACC GAA ATC  
M P F L L D V V C G G L I L L L G T E I

61/21  
|  
CTG TGG GTC GCT GGC GCT CAG AAA CGC TGC GAC AAA GAT ATC ACA ATG GTG ACC AAG AGC  
L W V A G A Q K R C D K D I T M V T K S

121/41  
|  
AAA TGT CAC AGT TGC AGC CTG TCT CAT CTG GCT AAA TGC CCT AAC GGA TAC GCC AAG ATG  
K C H S C S L S H L A K C P N G Y A K M

181/61  
|  
CCT CCA GGC ACT AGC GAC AGG GAT TGT CGC TAC TAT GTG ACA CCC GCA TTC TCC ATC TCA  
P P G T S D R D C R Y Y V T P A F S I S

241/81  
|  
GGA TGT TCT TTC AAC TGC TTT AAG GAG GTG GTC GAA CCT CAG TGT TGC AGG GGT TAT TGG  
G C S F N C F K E V V E P Q C C R G Y W

301/101  
|  
GGA AAT GAT TGT ATG GAG TGC CCT GGC AGT GCT AGC ACC CCA TGT TCA AAC AAT GGT GTG  
G N D C M E C P G S A S T P C S N N G V

361/121  
|  
TGC AGT GAC GGA ATC GCT GGT AAC GGA ACA TGT ACC TGC GCT TCT GGC TTC ACT GGT GCT  
C S D G I A G N G T C T C A S G F T G A

421/141  
|  
GCC TGT GAG GAA TGC AAA ACC GAC CTG TAC GGA CCA ACT TGC TCC AAC GTG TGT CGC TGC  
A C E E C K T D L Y G P T C S N V C R C

481/161  
|  
AAA AAT GGC CTG TGT AGC TCT GGT CTG AAG GGC ACT GGA GAG TGT ACA TGC TTT TCT GGA  
K N G L C S S G L K G T G E C T C F S G

541/181  
|  
TAT ACA GGC CTG GAT TGC GCC CAG GAA CTG CCC GCA TGT GCA GCT CTG CAG TGC GGA CCT  
Y T G L D C A Q E L P A C A A L Q C G P

601/201  
|  
GAC TCC AGA TGT ATC GAG GAA ATG CTG ACT GGT CAG CTG GTG TGT AAG TGC AAA CCT GGA  
D S R C I E E M L T G Q L V C K C K P G

661/221  
|  
TAC CAG GGA GAT GGC GTC CAG TGC ACC TCT ATT AAC CCA TGT CTG AGG TCC GTC TGC CAC  
Y Q G D G V Q C T S I N P C L R S V C H

721/241

GCT AAC GCC GTG TGT GCT CAC ACT GGA CCT  
A N A V C A H T G P

751/251

AAT AAA CAT GTG TGT ACT TGC ACA GAG GGC  
N K H V C T C T E G

781/261

TAC AGC GGT GAT GGA AGG GTC TGT ATG CCT  
Y S G D G R V C M P

811/271

ATC GAC CCA TGC CAG ACT AAC CTG GGA AAT  
I D P C Q T N L G N

841/281

TGC ACC TCT GGC TCC ACT CGC TGT GTG TAT  
C T S G S T R C V Y

871/291

GAC GGC CCA GGT AAA GCT CAC TGT GAG TGC  
D G P G K A H C E C

901/301

CTG AAA GGA TTC GAG AAG TTT GTC GAA GGA  
L K G F E K F V E G

931/311

CAG GGC TGC TCT ATC ATT GAC CTG TGT AAA  
Q G C S I I D L C K

961/321

CCC GAT TCC TGC CAT AAG TAC GCC ACT TGT  
P D S C H K Y A T C

991/331

GCA ACA GCT GAA CCT GGC ACC GTG GAG TGT  
A T A E P G T V E C

1021/341

AAC TGC AGA GAA GGT TAT ATC GGT AAT GGA  
N C R E G Y I G N G

1051/351

AAG ATT TGT TTC GGA GAT ATC ATT CAG CAG  
K I C F G D I I Q Q

1081/361

CTG AAC GAG ATG AAT TCT AAA CCT GGA GGC  
L N E M N S K P G G

1111/371

AAA TGG ACA GGC CAG CTG TCC TCA GCC ATC  
K W T G Q L S S A I

1141/381

ACC CTG TTC AAC CAA GTG ACT GGT TGG TTT  
T L F N Q V T G W F

1171/391

CTG ACA GCA AGG GGA CCC TTC ACT GTC TTT  
L T A R G P F T V F

1201/401

GTG CCT GTC AAT AAG GCT TTT AAA GGA ACA  
V P V N K A F K G T

1231/411

AGT GTG AAA AGC CTG CTG GCC GAC GAG ATG  
S V K S L L A D E M

1261/421

AAA GCC CGC TAC CTG GCA AAG CTG CAC GTG  
K A R Y L A K L H V

1291/431

GTC GCT GGA GAG GTG AAC TCA GAA AGT CTG  
V A G E V N S E S L

1321/441

AAG AAA GGC ATC CTG TTC CAT ACC CTG ACT  
K K G I L F H T L T

1351/451

GGC ATG GGT GCT GAG TCA ATG ATC GAT GCC  
G M G A E S M I D A

1381/461

GAA CAG GTG AAG ATT CGC CTG CAC GGT AGT  
E Q V K I R L H G S

1411/471

AGA AAG AAA GGA GCC CTG GTC GAG TCC GAC  
R K K G A L V E S D

1441/481

ATT TTT GCA TCA AAC GGA ATG ATC CAT CTG  
I F A S N G M I H L

1471/491

ATT GAC AAA CTG ATG GAT GCT GTG CCT AGT  
I D K L M D A V P S

1501/501

ACA GTC ATC AGC GAG AAG GAG GAA AGC CTG  
T V I S E K E E S L

1531/511

CTG GAA ATT CTG TCT AAG AAC GGA AAA TTC  
L E I L S K N G K F

1561/521

TCT CAG TTT AAA TCC CTG CTG GAG AAG ACA  
S Q F K S L L E K T

1591/531

AAT GTG GCA ACC GTC CTG GAG GAA GAT GGC  
N V A T V L E E D G

1621/541

CCA TAC ACC CTG TTC GCT CCC ACT AAC GTG  
P Y T L F A P T N V

1651/551

GCC TTT GCA CTG ATG AAA CCA GAC TAC CTG  
A F A L M K P D Y L

1681/561

GCC TAT CTG AAG AGC GAG GAA GGA AAG ACC  
A Y L K S E E G K T

1711/571

AAA CTG CTG GAG CTG ATG AGA AAC CAC ATC  
K L L E L M R N H I

1741/581

GTG GCA ACA ACC CCC CTG TCC GCT TAT GTG  
V A T T P L S A Y V

1771/591

ATT GTC TCA AAT CCT AGG GCT GTG ACA ATG  
I V S N P R A V T M

1801/601

GCT GAG CAG ATC CTG ACT TTC AAC GTC ACT  
A E Q I L T F N V T

1831/611

ACA GCC GGT CAG ATC CTG GTG AAT GGA GAG  
T A G Q I L V N G E

1861/621

TCT GTC ATT GAA CTG GAT GTG GAG GCA AAA  
S V I E L D V E A K

1891/631

AAC GGC CGC CTG CAC TCA CTG GAG GGT CTG  
N G R L H S L E G L

1921/641

CTG ATC CCC CCT AGT ATC GAA CCC ATT CTG  
L I P P S I E P I L

1951/651

CCT CAT AGA TGC GAC ATC ATT AAG CCT ATC  
P H R C D I I K P I

1981/661

AAA TAC ATG GCT CCA TGT GTG AGC TGC ACC  
K Y M A P C V S C T

2011/671

CTG ATT AGC AAA TCT ACC TGC CCC ACT GGA  
L I S K S T C P T G

2041/681

GAG TCT CTG AAG GCC TAT AGA AGG GGC TGT  
E S L K A Y R R G C

2071/691

GTG TTT AAC AAG AAA CAG CTG GGA CTG TCT  
V F N K K Q L G L S

2101/701

CTG CCT TCC ATC GGC TGT TCT CAC ATT TGC  
L P S I G C S H I C

2131/711

AAT GAT ACT AAA ACC ACT CCA CAG TGT TGC  
N D T K T T P Q C C

2161/721

AAG GGT TTC TTT GGA CCC GAC TGT TCA CCC  
K G F F G P D C S P

2191/731

TGC CCT GGT GGA TTC ACA ACC CCC TGT AGT  
C P G G F T T P C S

2221/741

AGC CAC GGA ACC TGC AGT GAG GGT ATC GAC  
S H G T C S E G I D

2251/751

GGA AAC GGC ACT TGT CAG TGC GAA CCT AAG  
G N G T C Q C E P K

2281/761

|  
TTT AAA GGA AGC AGA TGT CAG TAC TGC GCA  
F K G S R C Q Y C A

2311/771

|  
GAT TCC AAC AAA TAT GGC CCT AAT TGC GAC  
D S N K Y G P N C D

2341/781

|  
AAG ACA TGT TGG TGC ATC CAC GGT ACC TGT  
K T C W C I H G T C

2371/791

|  
GAT AAC CAT CCA GAG GCT TCT GGA AAG TGT  
D N H P E A S G K C

2401/801

|  
AAA CAG GGC AGT TGC AAG GAC GGC TAC ACT  
K Q G S C K D G Y T

2431/811

|  
GGA GAG TAT TGT GAA CTG CAG ACA CAG CCA  
G E Y C E L Q T Q P

2461/821

|  
TGT GGA CCC AAT CAG CCT TGC CAC GCT CAT  
C G P N Q P C H A H

2491/831

|  
GCC AAC TGT GTC TCC AAT AAA GGT GCT TTC  
A N C V S N K G A F

2521/841

|  
ACA TGT GTG TGC AAG CCT GGA TTT CAG GGT  
T C V C K P G F Q G

2551/851

|  
GAT GGA TAC ATG TGC ATG GAG TCT GAC CCT  
D G Y M C M E S D P

2581/861

|  
TGT GCA CTG CCA CAC AGA GGC GGT TGC TCC  
C A L P H R G G C S

2611/871

|  
AAA AAC GCT ATC TGT ATT AAG ACT GGC CCA  
K N A I C I K T G P

2641/881

|  
GGT ACA CAT AAG TGT AAA TGC CTG AGT GGT  
G T H K C K C L S G

2671/891

|  
TGG CGC GAA GAC GGA GAT GAG TGC CAG GCC  
W R E D G D E C Q A

2701/901

|  
ATC AAC AAT TGT CTG GAC CCT AGC AGA GGA  
I N N C L D P S R G

2731/911

|  
GGC TGC CAC CCA AAT GCC ACT TGT ATC TAC  
G C H P N A T C I Y

2761/921

|  
GTG GGA CCA GGC CAG ATT GAC TGT GCA TGC  
V G P G Q I D C A C

2791/931

|  
AAA AGC GGA TAT CAT GGT AAC GGA AGG GAG  
K S G Y H G N G R E

2821/941

|  
TGC GAA CCC GTG AAT CAG TGT GTC GAG CAG  
C E P V N Q C V E Q

2851/951

|  
AAG GGT GGA TGC CAC TTC CTG GCT ACA TGT  
K G G C H F L A T C

2881/961

|  
CAG TTT CTG AAC CCT GAT GGA TGG CAT TGT  
Q F L N P D G W H C

2911/971

|  
GTG TGC GAG GAC GGC TAC GCC GGC GAT GGT  
V C E D G Y A G D G

2941/981

|  
AAA ATC TGC TAT GGC ACT CTG CTG CAG GAG  
K I C Y G T L L Q E

2971/991

|  
GTC TCC ACA AAC CCC GAC CTG CTG GGA TTC  
V S T N P D L L G F

3001/1001

|  
AAT CAG TGG ATT TCA AAG GCT GAG CTG TCA  
N Q W I S K A E L S

3031/1011

|  
CAG CTG CTG AGT GAG AGA GAA AAC CTG ACT  
Q L L S E R E N L T

3061/1021

|  
CTG TTC GTG CCT TCA GCA CAG GCT ATC GAG  
L F V P S A Q A I E

3091/1031

|  
AAG ATG AGT AAA GAA GAC AAG GAT TTT TGG  
K M S K E D K D F W

3121/1041

|  
ATG ACA CCC AGC AAC CTG CCT TCT CTG GTG  
M T P S N L P S L V

3151/1051

|  
AAA AAT CAC ATT CTG TCC GGA TCA TTT ACA  
K N H I L S G S F T

3181/1061

|  
CTG AGC GAT CTG AAT ACC AGT CCA AGC CCA  
L S D L N T S P S P

3211/1071

|  
CCC CCT AGA CTG GTC AGC CTG CTG AAG AGG  
P P R L V S L L K R

3241/1081

|  
ACT CTG CCC GTG TAC TCT ACA AAC GAC ACT  
T L P V Y S T N D T

3271/1091

|  
ACA ATC GTC GCC GGC GGT AAA ATT ACC TTC  
T I V A G G K I T F

3301/1101

|  
GGT GAT ATG GCC GCA AAG AAT GGA GTC ATC  
G D M A A K N G V I

3331/1111

|  
CAC CTG ATT GAC ACT GTG CTG ATC CCT GAG  
H L I D T V L I P E

3361/1121

|  
CAG CAG ATG TCC GAA GGC CTG CTG CAG GTG  
Q Q M S E G L L Q V

3391/1131

|  
CTG AAG AAG AGA AGC GAC CTG AGT CTG TTT  
L K K R S D L S L F

3421/1141

|  
TAT GGA AGT CTG CTG AAC CAT AAT CTG ACA  
Y G S L L N H N L T

3451/1151

|  
AAC GAG ATG GAG GAA AGC CTG GGC TTC ACA  
N E M E E S L G F T

3481/1161

|  
GTG TTT GCT CCA ACC GAC AAT GCC ATC CAG  
V F A P T D N A I Q

3511/1171

|  
GAT TAC CTG AAA AGA ACC GGA AAG GAG AGC  
D Y L K R T G K E S

3541/1181

|  
CTG GAC CTG AAC GTG ACC ATG TAT CAC ATC  
L D L N V T M Y H I

3571/1191

|  
ATT CTG ACT GAA ATT CTG AAA GAC GTG GAT  
I L T E I L K D V D

3601/1201

|  
CTG GTC GAC GGC CTG TAC AAG GAT ACA ATG  
L V D G L Y K D T M

3631/1211

|  
CTG GGC TTC CAG TAT CAG CTG GGT TTC TTT  
L G F Q Y Q L G F F

3661/1221

|  
CGC CAG GAT AAA AGA CTG CTG GTG AAC GAG  
R Q D K R L L V N E

3691/1231

|  
GCT GAA GTG AAT GTC ACC GAC CTG GAG ACT  
A E V N V T D L E T

3721/1241

|  
AGC AAG GGA GTC ATC CAC ATC ATT AGC GCC  
S K G V I H I I S A

3751/1251

|  
GTG CTG AAC ATT CCA TCT AAT AGG TGT GAT  
V L N I P S N R C D

3781/1261

|  
AAA GCA ACC TCC ATC CTG TTC TCA GGA CGC  
K A T S I L F S G R

3811/1271

|  
TGT ATG GAC TGC TTT CAG ACA ATC ATT AAC  
C M D C F Q T I I N

3841/1281

CCA TGC CCC TCC GGC ACC AAG AAA GTG ATG  
P C P S G T K K V M

3871/1291

TCA AGG AAG CGC AGA TGT ATG TAC TCT CGC  
S R K R R C M Y S R

3901/1301

GTC CTG CAC GGC GAT ACA CTG CTG ACC ATC  
V L H G D T L L T I

3931/1311

GGT TGT AAA TTT TCA TGC GAG AAG ATG ACA  
G C K F S C E K M T

3961/1321

ATC GAA AGA ATT TGT TGC AGT GGA CAT TAT  
I E R I C C S G H Y

3991/1331

GGC ATT AAC TGT GAG AAA TGC CCT GGC AGT  
G I N C E K C P G S

4021/1341

GAA GAT CAG AGC TGC TTC GGA AAC GGC ATC  
E D Q S C F G N G I

4051/1351

TGT AAG GAC GGA ATT AAT GGT ACC GGA GTG  
C K D G I N G T G V

4081/1361

TGT CTG TGC AAC CAG GGT TTT AAT GGA ACT  
C L C N Q G F N G T

4111/1371

GCC TGT GAG AGC TGC CAG CCA GGC AAA TAC  
A C E S C Q P G K Y

4141/1381

GGT ATC CAC TGC GAC CAG GAA TGT AAA TGC  
G I H C D Q E C K C

4171/1391

GTG CAT GGC AGG TGT AAG GAT GGT ATT GAC  
V H G R C K D G I D

4201/1401

GGC GAT GGT TCC TGT GCT TGC GAC CTG GGA  
G D G S C A C D L G

4231/1411

TGG AGG GGT GTG AAC TGC GAT ATC GCC ATT  
W R G V N C D I A I

4261/1421

AAA TCA GAC ATG TGT GGT GGC AAG TGC CAC  
K S D M C G G K C H

4291/1431

TCT TCC GCC AAC TGT CTG GTG AAT GTG GTC  
S S A N C L V N V V

4321/1441

GAT TCA AGT TAC TAT TGT TCA TGC GCT GCC  
D S S Y Y C S C A A

4351/1451

GGA TTC CAG GGA AAC GGC ACC TAC TGC GAG  
G F Q G N G T Y C E

4381/1461

GCA ATC GAC GCC TGT GCA GAA AGA AAT GGT  
A I D A C A E R N G

4411/1471

GGA TGC AGC GCT CAC GCC GTG TGT AAA AGG  
G C S A H A V C K R

4441/1481

ACA CTG CCT GGC AGG CGC ATC TGT ATG TGC  
T L P G R R I C M C

4471/1491

CAT CCA GGT TAT GAG GGT GAC GGA AAG GTG  
H P G Y E G D G K V

4501/1501

TGC ACC AGT ATT AAC CCT TGT CTG GAT GGC  
C T S I N P C L D G

4531/1511

GTC AAT GGC GGT TGC CAC GCA GAC AGC AAC  
V N G G C H A D S N

4561/1521

TGT ATC CAT ACT GGA CCA AAT AAA ACA GCT  
C I H T G P N K T A

4591/1531

TGT CAC TGC AAG GAG GGA TTT TAC AAA GAT  
C H C K E G F Y K D

4621/1541

|  
GGC AAG AAC TGC GAG CTG ATC AAT CTG TGT  
G K N C E L I N L C

4651/1551

|  
AAG GAG AAG AAC GGA GGC TGC CAC CGC GCA  
K E K N G G C H R A

4681/1561

|  
GCT ATT TGT ACA ATG ACC GGT CCT CTG CAG  
A I C T M T G P L Q

4711/1571

|  
AGA AAT TGT ACA TGC CAT GCT GGA TAC GTG  
R N C T C H A G Y V

4741/1581

|  
GGC GAC GGA GAG ATT TGT AAG TAT ACC CTG  
G D G E I C K Y T L

4771/1591

|  
CAG AGA GAA CTG CCA ATT GGA ACT GCC AGG  
Q R E L P I G T A R

4801/1601

|  
ACA GCA TTC GTG AAA GCA ATG TTT AAG AAC  
T A F V K A M F K N

4831/1611

|  
CGC ATC TAC GAG CTG GAT ACC AGA GGC CCT  
R I Y E L D T R G P

4861/1621

|  
TTC ACT GTC TTC GCT TTC AGA AGT GAA AAC  
F T V F A F R S E N

4891/1631

|  
TAC AAG AAC CAG AGC ATT GAC CTG CTG AAG  
Y K N Q S I D L L K

4921/1641

|  
AGG ACA CCA GAG AAT ACC AGA ATC ATG AGG  
R T P E N T R I M R

4951/1651

|  
TAC CAC ATT GTG TGT TGC AGA ACA CTG CTG  
Y H I V C C R T L L

4981/1661

|  
CCC CAG GAT CTG ATG CAG CCT AGG AAC CTG  
P Q D L M Q P R N L

5011/1671

|  
ACC ACT CTG AGC GGA GAC ATC CTG TCT ATT  
T T L S G D I L S I

5041/1681

|  
ACA TAC TCC GAG AAC ACC ATC TAC ATC AAC  
T Y S E N T I Y I N

5071/1691

|  
AAC AAG GCC AAG GTG CTG TTT TCC GAT ATC  
N K A K V L F S D I

5101/1701

|  
GAG AGC TCT AAC GGC ATC CTG CAT GAA ATT  
E S S N G I L H E I

5131/1711

|  
GAC TCA GTG CTG GTC CCA CCC GGA CTG GAG  
D S V L V P P G L E

5161/1721

|  
ATT CGC GAA GAC AAG AAA CAG GAT ATC ATT  
I R E D K K Q D I I

5191/1731

|  
CCT AGA AAC TTC TCA GAA GTG GCA AGT GCT  
P R N F S E V A S A

5221/1741

|  
AAC GGA TTC AAG ACC TTC TTT AAG CTG CTG  
N G F K T F F K L L

5251/1751

|  
GAG GAC ACT GAT ACA CTG AAA CTG GTC ATG  
E D T D T L K L V M

5281/1761

|  
GAC CCA ATC CAC CAG CCC GTG ACT CTG TTC  
D P I H Q P V T L F

5311/1771

|  
ATG CCA ACA GAC GAT GCT ATG AGC GCC CTG  
M P T D D A M S A L

5341/1781

|  
TCT CAG GAA CAG AAA GAT TTT CTG TAC GCC  
S Q E Q K D F L Y A

5371/1791

|  
ATG CAC AAC AGA GAC AAG CTG TCT GAG TAC  
M H N R D K L S E Y

5401/1801

|  
CTG AGG TAT CAT ATC CTG CGC GAT ACT AAA  
L R Y H I L R D T K

5431/1811

|  
CTG ATG GCC TCC GAG CTG ATT TAC GCA TCC  
L M A S E L I Y A S

5461/1821

|  
TCA CTG AAG ACA CAG CAG GGA AGC GAC CTG  
S L K T Q Q G S D L

5491/1831

|  
TCA GTG GCA TGC ATG GGA GAG GAA CAG ATC  
S V A C M G E E Q I

5521/1841

|  
GGA GAG CTG TAT GTC AAC CAC AAA GGA TGT  
G E L Y V N H K G C

5551/1851

|  
AGG ATT GTG AAG CGC TAC CTG GAT TTC AAC  
R I V K R Y L D F N

5581/1861

|  
GGT GGA ATG ATC TAT GGC ATT GAC TGC CTG  
G G M I Y G I D C L

5611/1871

|  
CTG AAT CCT CCA TCC CTG GGC GGT AGA TGT  
L N P P S L G G R C

5641/1881

|  
GAT CAT AGG CAG ACT ATC GAC TTT ACA CTG  
D H R Q T I D F T L

5671/1891

|  
GCC TGT AGA AGC TGC GGA AGT AGC ATT ATG  
A C R S C G S S I M

5701/1901

|  
GAT TGC CCA CTG GGC TCT AAG CCT GGA GGA  
D C P L G S K P G G

5731/1911

|  
GAG CAG GAA TGT GTC CTG CCA GAC AGT GTG  
E Q E C V L P D S V

5761/1921

|  
ATC AGC AGA GGA TCT AAA TGT CAG TCT ACA  
I S R G S K C Q S T

5791/1931

|  
TGC AAG GTG GTC GTG TGG AAG CCC AAA TGT  
C K V V V W K P K C

5821/1941

|  
TGC TCC GGT TAC TAT GGA AGG GAT TGT CTG  
C S G Y Y G R D C L

5851/1951

|  
GCA TGC CCA GGT GGA CCC CAG TCC CCT TGC  
A C P G G P Q S P C

5881/1961

|  
TCA AAC CAC GGC AAA TGT GAC GAG GAT CAT  
S N H G K C D E D H

5911/1971

|  
CTG GGA AAT GGC ACC TGT ACT TGC GAC ACC  
L G N G T C T C D T

5941/1981

|  
GGC TTC ACT GGT GTG GCT TGT GAG TCT TGC  
G F T G V A C E S C

5971/1991

|  
CTG GAT GGA CAC TTT GGC CCT GAC TGC AAG  
L D G H F G P D C K

6001/2001

|  
GCT TGT AAC TGC ACA GAG CAT GGC TCC TGT  
A C N C T E H G S C

6031/2011

|  
GAT GAA GGT CTG CAG GGT ACA GGA TCA TGT  
D E G L Q G T G S C

6061/2021

|  
TTC TGC GAG GAA GGT TGG ACC GGA CCA CAG  
F C E E G W T G P Q

6091/2031

|  
TGC GAG AAC AAA CTG GCA GAT GGA CCC GTG  
C E N K L A D G P V

6121/2041

|  
TGT AAG TAC TGG AAT GGC GGT TGC AGT AAA  
C K Y W N G G C S K

6151/2051

|  
GAC GCT AAG TGT AGC CAG AAA GGA GAG AAA  
D A K C S Q K G E K



6181/2061

|  
GTG AGC TGT GCC TGC CTG CAG GGA TTC TCT  
V S C A C L Q G F S

6211/2071

|  
GGC GAC GGT TTT GTC TGC ACC CCA ATC GAC  
G D G F V C T P I D

6241/2081

|  
CCC TGT GTG GAT GGA GAG AAC GGA GGC TGC  
P C V D G E N G G C

6271/2091

|  
CAC GAA CAT GCT ACA TGT ACC ATG ACT GGA  
H E H A T C T M T G

6301/2101

|  
CCA GGC AAG CGC AAG TGT GAG TGC AAA GAT  
P G K R K C E C K D

6331/2111

|  
TCT TAC GTG GGT GAC GGA ATC GAT TGC GAA  
S Y V G D G I D C E

6361/2121

|  
GCC AAG GTG CTG CCC GTC AAC AGA TGT CTG  
A K V L P V N R C L

6391/2131

|  
GTC GAC AAT GGA CAG TGC CAC TCA GAC GCA  
V D N G Q C H S D A

6421/2141

|  
CAG TGT ACC GAT CTG CAC CAT GAG GAC AAA  
Q C T D L H H E D K

6451/2151

|  
ACT CTG GGT GTG TTC CAT TAT AGA AGT ACA  
T L G V F H Y R S T

6481/2161

|  
AAC GGA ACC TAC AAA CTG AAT TAT ACT ATG  
N G T Y K L N Y T M

6511/2171

|  
GCA CAG GAA GCT TGT AAG GAG GCA GGC AGC  
A Q E A C K E A G S

6541/2181

|  
ACT ATC GCT ACA TAC ATG CAG CTG TCC TAT  
T I A T Y M Q L S Y

6571/2191

|  
GCC CAG CAG GCA GGA TAC TCA CTG TGC ACA  
A Q Q A G Y S L C T

6601/2201

|  
GCT GGC TGG CTG GAT AAA GCT CGC GTG GCC  
A G W L D K A R V A

6631/2211

|  
TAT CCA ATG AGT TTC TCT TCC CCC AGA TGT  
Y P M S F S S P R C

6661/2221

|  
GGC AGC GGT CAC GTG GGA ATC GTC GAC TAC  
G S G H V G I V D Y

6691/2231

|  
GGC GTG AGG AAC AAT CTG AGC GAG ACC TGG  
G V R N N L S E T W

6721/2241

|  
GAT ACT TTT TGC TAC CGC GTG AAG GAC GTC  
D T F C Y R V K D V

6751/2251

|  
CAG TGT AAG TGC AAA ACA GGC TAT ATC GGA  
Q C K C K T G Y I G

6781/2261

|  
GAT GGC TTC AGT TGT ATT GGT AAC CTG ATG  
D G F S C I G N L M

6811/2271

|  
CAG GTG CTG AGC GCC ACA CCC ACC CTG AGC  
Q V L S A T P T L S

6841/2281

|  
AAC TTT CTG TCT CAG ATC CTG AAT TAC TCT  
N F L S Q I L N Y S

6871/2291

|  
ACC TCC GCA TCA GGA AAG GCT TTC GTG AAC  
T S A S G K A F V N

6901/2301

|  
AGA CTG AGG AAT ATC ACC ATT CAG TCT ACT  
R L R N I T I Q S T

6931/2311

|  
CTG TTT GTC CCA GAC AAC GAT GGC CTG TAT  
L F V P D N D G L Y

|                                                                                                                                                                                                                                                                                                                                                                                                                                                                                                                                                                                                                                                                                                                                                                                                                                                                                                                                         |                                                                                                                                                                                                                                                                                                                                                                                                                                                                                                                                                                                                                                                                                                                                                                                                                                                    |
|-----------------------------------------------------------------------------------------------------------------------------------------------------------------------------------------------------------------------------------------------------------------------------------------------------------------------------------------------------------------------------------------------------------------------------------------------------------------------------------------------------------------------------------------------------------------------------------------------------------------------------------------------------------------------------------------------------------------------------------------------------------------------------------------------------------------------------------------------------------------------------------------------------------------------------------------|----------------------------------------------------------------------------------------------------------------------------------------------------------------------------------------------------------------------------------------------------------------------------------------------------------------------------------------------------------------------------------------------------------------------------------------------------------------------------------------------------------------------------------------------------------------------------------------------------------------------------------------------------------------------------------------------------------------------------------------------------------------------------------------------------------------------------------------------------|
| <p>6961/2321<br/> <br/>AGT AAT CAG ACT CTG AGC GGT AGG GAT ATC<br/>S N Q T L S G R D I</p> <p>7021/2341<br/> <br/>ATC CTG CAG GCA CTG ATT AAC GTG ACA CAC<br/>I L Q A L I N V T H</p> <p>7081/2361<br/> <br/>ATT ACA GGA GTG CCA GAC CTG CAG AAC CCC<br/>I T G V P D L Q N P</p> <p>7141/2381<br/> <br/>GAT AGA TAT GTG ATC GAC TCT AAC ATT TTC<br/>D R Y V I D S N I F</p> <p>7201/2401<br/> <br/>GGT CCT CTG AAG GCA CCA CCT CCA CCA ACC<br/>G P L K A P P P P T</p> <p>7261/2421<br/> <br/>CTG GGA ATC GGC GTG CTG GGA CTG ATC ATT<br/>L G I G V L G L I I</p> <p>7321/2441<br/> <br/>AAC TTT TAT ACA CAC AAG ACC AAA CCA TTC<br/>N F Y T H K T K P F</p> <p>7381/2461<br/> <br/>GAA GAT GTG ACC CCT ACT GAG TCC TCA CCA<br/>E D V T P T E S S P</p> <p>7441/2481<br/> <br/>CCA GCA ACC AAG GAG CAG CCT CCA ACC GAG<br/>P A T K E Q P P T E</p> <p>7501/2501<br/> <br/>GTC TTC GAG CTG CTG CAG GAC TCA TGA<br/>V F E L L Q D S *</p> | <p>6991/2331<br/> <br/>GAG CAC CAT CTG CTG GAC GGA AGG GCA CTG<br/>E H H L L D G R A L</p> <p>7051/2351<br/> <br/>GTC CGC ACC AGA CTG GGT TCA AGT CTG ACT<br/>V R T R L G S S L T</p> <p>7111/2371<br/> <br/>CAG AAA ATG ACA AGC TCT GGC TAC ATC AAT<br/>Q K M T S S G Y I N</p> <p>7171/2391<br/> <br/>GCT TCC AAT GGC GTG ATT CAT GTC CTG CAG<br/>A S N G V I H V L Q</p> <p>7231/2411<br/> <br/>CCT TCC TTT CAC CCA GCA CAT CAG GCT GGT<br/>P S F H P A H Q A G</p> <p>7291/2431<br/> <br/>CTG ATT GTC GTG GCT GGC TTC GTC GGT TAC<br/>L I V V A G F V G Y</p> <p>7351/2451<br/> <br/>CAG TTT TAC TAT TTC AAA GGA GAC GAG GGC<br/>Q F Y Y F K G D E G</p> <p>7411/2471<br/> <br/>AAC ATC AGC AAT CCA GTC TAC GAC GCA GCA<br/>N I S N P V Y D A A</p> <p>7471/2491<br/> <br/>GAG GAC AAA CAT CAG GTC ATC TCA AGT GGC<br/>E D K H Q V I S S G</p> |
|-----------------------------------------------------------------------------------------------------------------------------------------------------------------------------------------------------------------------------------------------------------------------------------------------------------------------------------------------------------------------------------------------------------------------------------------------------------------------------------------------------------------------------------------------------------------------------------------------------------------------------------------------------------------------------------------------------------------------------------------------------------------------------------------------------------------------------------------------------------------------------------------------------------------------------------------|----------------------------------------------------------------------------------------------------------------------------------------------------------------------------------------------------------------------------------------------------------------------------------------------------------------------------------------------------------------------------------------------------------------------------------------------------------------------------------------------------------------------------------------------------------------------------------------------------------------------------------------------------------------------------------------------------------------------------------------------------------------------------------------------------------------------------------------------------|

**Supplemental Figure S4. Translation of zebrafish *stab2* cDNA used for mRNA rescue.** DNA sequence has been modified to optimize codon usage and avoid MO binding. Protein sequence has not changed.
