# Supplementary material for: Hyaluronic Acid Receptor Stabilin-2 Regulates Erk Phosphorylation and Arterial - Venous Differentiation in Zebrafish
Source: PubMed Central journal article supplement (PMC3938420; doi:10.1371/journal.pone.0088614), 2014-02-28
Supplement: pone.0088614.s005.pdf [file pone.0088614.s005.pdf]

|       | <b>Total N counted</b> | <b>Percent with reduced or absent ISVs</b> |
|-------|------------------------|--------------------------------------------|
| fli1a | 25                     | 56 ± 1.3                                   |
| kdrl  | 31                     | 77 ± 8.9                                   |
| esam  | 31                     | 48 ± 1.7                                   |
| she   | 30                     | 63 ± 0.9                                   |

**Suppl. Table S1. Stab2 knockdown results in a reduction in ISV expression as analyzed by whole mount ISH with 4 separate vascular endothelial markers.** Numbers and average percentages of embryos displaying absent or reduced ISVs when injected with a cocktail containing 3.75 ng total Stab2 MOs and 3.75 ng p53 MO. Value ± represents standard error. Analysis performed at the 24 hpf stage. All wild type uninjected embryos appeared normal.
