# Supplementary material for: Hyaluronic Acid Receptor Stabilin-2 Regulates Erk Phosphorylation and Arterial - Venous Differentiation in Zebrafish
Source: PubMed Central journal article supplement (PMC3938420; doi:10.1371/journal.pone.0088614), 2014-02-28
Supplement: pone.0088614.s006.pdf [file pone.0088614.s006.pdf]

|        | <b>Total N Counted</b> | <b>Percent with expanded expression</b> |
|--------|------------------------|-----------------------------------------|
| aqp8   | 37                     | 49 ± 7.0                                |
| cldn5b | 96                     | 43 ± 14.3                               |
| grl    | 34                     | 0 ± 0.0                                 |
| flt4   | 35                     | 66 ± 6.7                                |
| mrc1   | 63                     | 38 ± 5.7                                |
| stab1l | 70                     | 73 ± 8.3                                |
| stab2  | 44                     | 77 ± 21.7                               |

**Suppl. Table S2. Stab2 knockdown results in the expansion of several arterial and venous specific markers as analyzed with whole mount ISH analysis.** Numbers and average percentages of embryos displaying expansion when injected with a cocktail containing 3.75 ng total Stab2 MOs and 3.75 ng p53 MO. Value ± represents standard error. Analysis performed at 24 hpf. All uninjected embryos appeared normal.
