# Supplementary material for: Hyaluronic Acid Receptor Stabilin-2 Regulates Erk Phosphorylation and Arterial - Venous Differentiation in Zebrafish
Source: PubMed Central journal article supplement (PMC3938420; doi:10.1371/journal.pone.0088614), 2014-02-28
Supplement: pone.0088614.s007.pdf [file pone.0088614.s007.pdf]

|               | <b>Total N counted</b> | <b>Percentage with expanded expression</b> |
|---------------|------------------------|--------------------------------------------|
| Stab2 MO      | 31                     | 90 ± 5                                     |
| Stab2 MO+mRNA | 31                     | 52 ± 1                                     |

**Suppl. Table S3. Stab2 mRNA injection partially rescues the Stab2 morpholino knockdown phenotype.** Numbers and percentages of embryos displaying expanded *flt4* expression as analyzed by whole mount in situ hybridization when injected with either 3.75 ng of Stab2 MO + 3.75 ng p53 MO or 3.75 ng Stab2 MO + 3.75 ng p53 MO + 160 pg *stab2* mRNA. Value ± represents standard error.
