# Supplementary material for: Hyaluronic Acid Receptor Stabilin-2 Regulates Erk Phosphorylation and Arterial - Venous Differentiation in Zebrafish
Source: PubMed Central journal article supplement (PMC3938420; doi:10.1371/journal.pone.0088614), 2014-02-28
Supplement: pone.0088614.s008.pdf [file pone.0088614.s008.pdf]

|                                     | <b>Control Uninjected</b> | <b>Stab2 MO</b>     |
|-------------------------------------|---------------------------|---------------------|
| Decreased arterial P-Erk expression | 14.4% ± 6<br>N = 28       | 73.5% ± 5<br>N = 34 |
| Increased <i>stab1l</i> expression  | 0.0% ± 0<br>N = 37        | 70% ± 1<br>N = 37   |

**Suppl. Table S4. Stab2 knockdown results in decreased Erk phosphorylation and expanded venous marker expression.** Numbers and percentages of embryos displaying decreased Erk phosphorylation, as well as numbers and percentages of embryos from the same experiments displaying expanded expression of venous marker *stab1l* are shown. Value ± represents standard error. Embryos were injected with a cocktail containing 3.75 ng total Stab2 MOs and 3.75 ng p53 MO
