# Supplementary material for: Hyaluronic Acid Receptor Stabilin-2 Regulates Erk Phosphorylation and Arterial - Venous Differentiation in Zebrafish
Source: PubMed Central journal article supplement (PMC3938420; doi:10.1371/journal.pone.0088614), 2014-02-28
Supplement: pone.0088614.s010.pdf [file pone.0088614.s010.pdf]

|                    | <b>Total N counted</b> | <b>Percent with reduced or absent ISVs</b> |
|--------------------|------------------------|--------------------------------------------|
| wt                 | 58                     | 0 ± 0                                      |
| Stab2 MO           | 62                     | 18 ± 3.8                                   |
| Has2 MO            | 63                     | 0 ± 0                                      |
| Stab2 MO + Has2 MO | 55                     | 51 ± 0.7                                   |

**Suppl. Table S6. Subphenotypic doses of Stab2 MO + Has2 MO result in a synergistic effect as analyzed in Tg(*kdr*:GFP embryos).** Numbers and percentages of embryos displaying absent or reduced ISVs when injected with 1.25 ng Stab2 MO + 1.25 ng p53 MO and/or 8ng Has2 MO + 2.5 ng p53 MO. Value ± represents standard error. Embryos were then analyzed for missing or severely reduced ISV expression at the 24 hpf stage.
